# Supplementary material for: Magnetic CoFe alloy–Co supported on mesoporous carbon as an efficient catalyst for the degradation of bensulfuron-methyl: insight into the effect of calcination temperature on carbon defects and singlet oxygen
Source: Royal Society of Chemistry journal article supplement (doi:10.1039/d4ta03834g), 2024-01-01
Supplement: d4ta03834g1.pdf [file d4ta03834g1.pdf]

## Supplementary materials

Table S1 The dosages of different proportions of raw materials when preparing catalysts

| Proportion | Co(NO <sub>3</sub> ) <sub>3</sub> ·6H <sub>2</sub> O | Fe(NO <sub>3</sub> ) <sub>3</sub> ·9H <sub>2</sub> O |
|------------|------------------------------------------------------|------------------------------------------------------|
| Co:Fe(2:1) | 2 mmol (0.5820 g)                                    | 1 mmol (0.4040 g)                                    |
| Co:Fe(1:1) | 1.5 mmol (0.4366 g)                                  | 1.5 mmol (0.6060 g)                                  |
| Co:Fe(1:2) | 1 mmol (0.2910 g)                                    | 2 mmol (0.8080 g)                                    |
| Co         | 3 mmol (0.8730 g)                                    | /                                                    |
| Fe         | /                                                    | 3 mmol (1.2120 g)                                    |

Three standard buffer solutions were brought for pH meter calibration, including potassium hydrogen phthalate (0.05 mol/L, pH=4.01), phosphate buffer (0.025 mol/L, pH=6.86) and boric acid (0.01 mol/L, pH=9.18). Immerse the electrode into the standard buffer solution with different pH value and adjust the measured value to the standard pH value in calibration mode of pH meter.

In order to improve the separation degree of pollutants and degradation products, 1‰ formic acid methanol was prepared by adding 1/1000 formic acid into the mobile phase of methanol. The detailed detect conditions for different pollutants were as followed.

Table S2 The detailed HPLC conditions for the determination of different pollutants

| Pollutants | Measure wavelength/nm | V <sub>H<sub>2</sub>O</sub> :V <sub>Me</sub> |
|------------|-----------------------|----------------------------------------------|
| BSM        | 280                   | 20:80                                        |
| TCP        | 295                   | 10:90                                        |
| SPY        | 270                   | 50:50                                        |
| PNT        | 240                   | 30:70                                        |

The concentration of positive ions was obtained by Inductively Coupled Plasma Optical Emission Spectrometer (ICP-OES), while that of anions was obtained by ion chromatograph. Moreover, total organic carbon analyzer was used to analyze TOC concentration in Yangtze River and Xuanwu Lake.

Table S3 Main parameters of Yangtze River and Xuanwu Lake water samples

| <b>Test Project</b>                    | <b>Yangtze River</b> | <b>Xuanwu Lake</b> |
|----------------------------------------|----------------------|--------------------|
| TOC(ppm)                               | 17.89                | 19.96              |
| pH                                     | 7.04                 | 7.65               |
| Cl <sup>-</sup> (mM)                   | 1.46                 | 0.77               |
| NO <sub>3</sub> <sup>-</sup> (mM)      | 0.20                 | 0.15               |
| PO <sub>4</sub> <sup>2-</sup> (mM)     | 0.08                 | 0.07               |
| HCO <sub>3</sub> <sup>-</sup> (mM)     | 0.65                 | 0.08               |
| SO <sub>4</sub> <sup>2-</sup> (mM)     | 0.56                 | 0.06               |
| Ca <sup>2+</sup> (mg·L <sup>-1</sup> ) | 44.42                | 27.83              |
| Mg <sup>2+</sup> (mg·L <sup>-1</sup> ) | 9.98                 | 8.31               |
| Na <sup>+</sup> (mg·L <sup>-1</sup> )  | 27.94                | 17.77              |
| K <sup>+</sup> (mg·L <sup>-1</sup> )   | 27.63                | 3.37               |

Table S4 Co 2p, Fe 2p, C 1s and O 1s content of CoFe-Co/MC before and after use

| <b>Element</b> | <b>Valance</b>   | <b>Peak (eV)</b> | <b>Peak area (Before)</b> | <b>Peak area (After)</b> |          |
|----------------|------------------|------------------|---------------------------|--------------------------|----------|
| Co 2p          | Co(0)            | 778.8            | 5893.10                   | 2341.57                  |          |
|                |                  | 798.5            | 16320.17                  | 11575.31                 |          |
|                | Co(II)           | 782.7            | 35124.09                  | 34651.53                 |          |
|                |                  | 781.1            | 41033.24                  | 50172.90                 |          |
|                | Co(III)          | 796.9            | 18022.22                  | 22261.32                 |          |
|                |                  | Sat.             | 786.8                     | 61827.51                 | 59366.03 |
|                |                  |                  | 803.3                     | 33236.74                 | 27155.54 |
| Fe 2p          | Fe(0)            | 708.8            | 3641.08                   | 0                        |          |
|                |                  | 720.3            | 8416.54                   | 9281.70                  |          |
|                | Fe(II)           | 711.6            | 17795.51                  | 17805.97                 |          |
|                |                  | 713.7            | 16521.52                  | 22974.09                 |          |
|                | Fe(III)          | 723.6            | 6470.01                   | 8723.68                  |          |
|                |                  | Sat.             | 716.6                     | 23321.76                 | 17427.90 |
|                |                  |                  | 725.9                     | 7732.35                  | 6042.51  |
| C 1s           | C-C              | 284.6            | 180148.95                 | 175832.96                |          |
|                |                  | defect           | 285.1                     | 89638.10                 | 82821.10 |
|                | C-O              | 286.1            | 21852.91                  | 28824.85                 |          |
|                |                  | C=O              | 288.8                     | 18767.14                 | 22443.85 |
| O 1s           | O <sub>O-H</sub> | 531.8            | 109592.98                 | 115266.74                |          |
|                | O <sub>ab</sub>  | 533.2            | 101780.17                 | 146165.74                |          |

Table S5 HPLC-HRMS data of the intermediates for the degradation of BSM in the  
CoFe-Co/MC/PMS system

| <b>Products number</b> | <b>Formula</b>                                                 | <b>Found at (min)</b> | <b>Mass [M-H]<sup>-</sup></b> | <b>Found at Mass [M-H]<sup>-</sup></b> | <b>Error (ppm)</b> | <b>Main MS<sup>2</sup></b> |
|------------------------|----------------------------------------------------------------|-----------------------|-------------------------------|----------------------------------------|--------------------|----------------------------|
| P1                     | C <sub>9</sub> H <sub>11</sub> NO <sub>4</sub> S               | 10.12                 | 228.0336                      | 228.03403                              | 1.9                | 196、132                    |
| P2                     | C <sub>9</sub> H <sub>10</sub> O <sub>5</sub> S                | 4.12                  | 229.01762                     | 229.01782                              | 0.9                | 80                         |
| P3                     | C <sub>8</sub> H <sub>9</sub> NO <sub>4</sub> S                | 9.3                   | 214.01795                     | 214.01874                              | 3.7                | /                          |
| P4                     | C <sub>9</sub> H <sub>10</sub> O <sub>2</sub>                  | 4.91                  | 149.0608                      | 149.06097                              | 1.1                | 117、90                     |
| P5                     | C <sub>8</sub> H <sub>8</sub> O <sub>2</sub>                   | 4.29                  | 135.04515                     | 135.0444                               | -5.5               | 120、92                     |
| P8                     | C <sub>7</sub> H <sub>10</sub> N <sub>4</sub> O <sub>6</sub> S | 4.34                  | 277.02483                     | 277.02532                              | 1.8                | 122、96                     |
| P11                    | C <sub>5</sub> H <sub>7</sub> N <sub>3</sub> O <sub>2</sub>    | 7.56                  | 140.04655                     | 140.4653                               | -0.2               | /                          |
| <b>Products number</b> | <b>Formula</b>                                                 | <b>Found at (min)</b> | <b>Mass [M-H]<sup>+</sup></b> | <b>Found at Mass [M-H]<sup>+</sup></b> | <b>Error (ppm)</b> | <b>Main MS<sup>2</sup></b> |
| P6                     | C <sub>6</sub> H <sub>6</sub> O <sub>2</sub>                   | 11.05                 | 111.04406                     | 111.04446                              | 3.6                | /                          |
| P7                     | C <sub>7</sub> H <sub>5</sub> NO <sub>3</sub> S                | 5.78                  | 184.00629                     | 184.00519                              | -6                 | /                          |
| P9                     | C <sub>7</sub> H <sub>10</sub> N <sub>4</sub> O <sub>3</sub>   | 5.94                  | 199.08257                     | 199.08286                              | 1.5                | 156、100                    |
| P10                    | C <sub>6</sub> H <sub>9</sub> N <sub>3</sub> O <sub>2</sub>    | 2.53                  | 156.07675                     | 156.07698                              | 1.4                | 68、57                      |
| P12                    | C <sub>6</sub> H <sub>7</sub> N <sub>3</sub> O <sub>4</sub>    | 5.74                  | 186.05093                     | 186.05091                              | -0.1               | 139、93                     |
| P13                    | C <sub>4</sub> H <sub>4</sub> N <sub>2</sub> O <sub>3</sub>    | 0.44                  | 129.02947                     | 129.02962                              | 1.2                | 82、56                      |

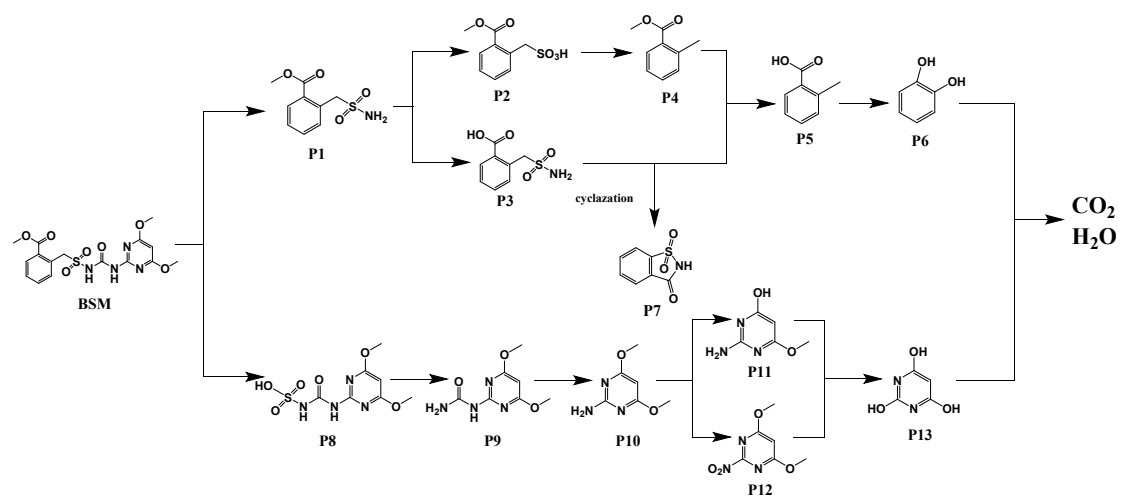

**Fig. S1** The possible degradation pathways of BSM detected by HPLC-HRMS.

## Raw data

|    | Co+PMS |          | Fe+PMS   |          | Co:Fe(2.1) + PMS |          | MC + PMS |          | Co/MC + PMS |          | Fe/MC + PMS |          | Co:Fe(2.1)/MC + PMS |          | PMS only |          |          |
|----|--------|----------|----------|----------|------------------|----------|----------|----------|-------------|----------|-------------|----------|---------------------|----------|----------|----------|----------|
| 1  |        |          |          |          |                  |          |          |          |             |          |             |          |                     |          |          |          |          |
| 2  | 0      | 705045   | 705045   | 722295   | 722295           | 718506   | 718506   | 737912   | 737912      | 730666   | 730666      | 746355   | 746355              | 730666   | 730666   | 730272   | 730272   |
| 3  | 1      | 648286   | 659830   | 705328   | 710676           | 689749   | 693461   | 720810   | 720650      | 564816   | 577314      | 707980   | 688177              | 686112   | 669069   | 700663   | 697866   |
| 4  | 3      | 605179   | 624130   | 695965   | 697750           | 684398   | 671292   | 719000   | 697954      | 221544   | 242390      | 667309   | 689032              | 492137   | 501234   | 683701   | 691866   |
| 5  | 5      | 511236   | 517597   | 686928   | 673266           | 634742   | 642391   | 703142   | 692746      | 87613    | 41231       | 656575   | 669703              | 308945   | 296217   | 668793   | 685122   |
| 6  | 7      | 415561   | 412234   | 654347   | 660142           | 579588   | 576902   | 697164   | 688811      | 10258    | 12086       | 653406   | 655213              | 156938   | 140053   | 670524   | 675648   |
| 7  | 10     | 273139   | 274486   | 650427   | 642672           | 487765   | 485851   | 650427   | 677335      | 0        | 0           | 628154   | 630339              | 34213    | 39424    | 660158   | 669918   |
| 8  |        |          |          |          |                  |          |          |          |             |          |             |          |                     |          |          |          |          |
| 9  |        |          |          |          |                  |          |          |          |             |          |             |          |                     |          |          |          |          |
| 10 | 0      | 1        | 1        | 1        | 1                | 1        | 1        | 1        | 1           | 1        | 1           | 1        | 1                   | 1        | 1        | 1        | 1        |
| 11 | 1      | 0.919496 | 0.935869 | 0.97651  | 0.983914         | 0.959977 | 0.965143 | 0.976824 | 0.976607    | 0.773015 | 0.79012     | 0.948583 | 0.92205             | 0.939023 | 0.915697 | 0.959455 | 0.955625 |
| 12 | 3      | 0.858355 | 0.885234 | 0.963547 | 0.966018         | 0.952529 | 0.934289 | 0.974371 | 0.94585     | 0.303208 | 0.331738    | 0.894091 | 0.923196            | 0.673546 | 0.685996 | 0.936228 | 0.947409 |
| 13 | 5      | 0.725111 | 0.734133 | 0.951035 | 0.932121         | 0.883419 | 0.894065 | 0.952881 | 0.938792    | 0.119908 | 0.056429    | 0.879709 | 0.897298            | 0.422827 | 0.405407 | 0.915814 | 0.938174 |
| 14 | 7      | 0.589411 | 0.584692 | 0.905928 | 0.913951         | 0.806657 | 0.802919 | 0.944779 | 0.93346     | 0.014039 | 0.016541    | 0.875463 | 0.877884            | 0.214788 | 0.191679 | 0.918184 | 0.9252   |
| 15 | 10     | 0.387406 | 0.389317 | 0.9005   | 0.889764         | 0.67886  | 0.676196 | 0.881443 | 0.917908    | 0        | 0           | 0.841629 | 0.844557            | 0.046824 | 0.053956 | 0.903989 | 0.917217 |
| 16 |        |          |          |          |                  |          |          |          |             |          |             |          |                     |          |          |          |          |
| 17 |        |          |          |          |                  |          |          |          |             |          |             |          |                     |          |          |          |          |
| 18 |        |          |          |          |                  |          |          |          |             |          |             |          |                     |          |          |          |          |
| 19 |        |          |          |          |                  |          |          |          |             |          |             |          |                     |          |          |          |          |
| 20 |        |          |          |          |                  |          |          |          |             |          |             |          |                     |          |          |          |          |

Fig. 3a

Reaction conditions:  $c(\text{PMS}) = 0.3 \text{ mmol}\cdot\text{L}^{-1}$ ,  $c(\text{catalyst}) = 50 \text{ mg}\cdot\text{L}^{-1}$ ,  $c(\text{BSM}) = 10 \text{ mg}\cdot\text{L}^{-1}$ ,  $\text{pH} = 7.0$ ,  $T = 25^\circ\text{C}$ .

|    | Co:Fe(1.2)+PMS |          | Co:Fe(1.1)+PMS |          | Co:Fe(2.1)+PMS |          |          |
|----|----------------|----------|----------------|----------|----------------|----------|----------|
| 1  |                |          |                |          |                |          |          |
| 2  | 0              | 730666   | 730666         | 742762   | 697255         | 730666   | 730666   |
| 3  | 1              | 684316   | 679132         | 694564   | 660764         | 686112   | 669069   |
| 4  | 3              | 557006   | 527846         | 595232   | 576069         | 492137   | 501234   |
| 5  | 5              | 485331   | 482791         | 523089   | 463302         | 308945   | 296217   |
| 6  | 7              | 403498   | 415938         | 414475   | 351259         | 156938   | 140053   |
| 7  | 10             | 298144   | 310616         | 245637   | 203342         | 34213    | 39424    |
| 8  |                |          |                |          |                |          |          |
| 9  | 0              | 1        | 1              | 1        | 1              | 1        | 1        |
| 10 | 1              | 0.936565 | 0.92947        | 0.93511  | 0.889604       | 0.939023 | 0.915697 |
| 11 | 3              | 0.762326 | 0.722418       | 0.801376 | 0.775577       | 0.673546 | 0.685996 |
| 12 | 5              | 0.664231 | 0.660755       | 0.704248 | 0.623756       | 0.422827 | 0.405407 |
| 13 | 7              | 0.552233 | 0.569259       | 0.558019 | 0.472909       | 0.214788 | 0.191679 |
| 14 | 10             | 0.408044 | 0.425114       | 0.330708 | 0.273765       | 0.046824 | 0.053956 |
| 15 |                |          |                |          |                |          |          |
| 16 |                |          |                |          |                |          |          |
| 17 |                |          |                |          |                |          |          |
| 18 |                |          |                |          |                |          |          |
| 19 |                |          |                |          |                |          |          |
| 20 |                |          |                |          |                |          |          |

Fig. 3b

Reaction conditions:  $c(\text{PMS}) = 0.3 \text{ mmol}\cdot\text{L}^{-1}$ ,  $c(\text{catalyst}) = 50 \text{ mg}\cdot\text{L}^{-1}$ ,  $c(\text{BSM}) = 10 \text{ mg}\cdot\text{L}^{-1}$ ,  $\text{pH} = 7.0$ ,  $T = 25^\circ\text{C}$ .

|    | 700 |          | 800      |          | 900      |          |          |
|----|-----|----------|----------|----------|----------|----------|----------|
| 1  |     |          |          |          |          |          |          |
| 2  | 0   | 715031   | 715031   | 738036   | 738036   | 730666   | 730666   |
| 3  | 1   | 714234   | 711018   | 676140   | 687234   | 686112   | 669069   |
| 4  | 3   | 708346   | 707808   | 512989   | 498860   | 492137   | 501234   |
| 5  | 5   | 637639   | 648648   | 385466   | 356671   | 308945   | 296217   |
| 6  | 7   | 513486   | 535989   | 244548   | 237850   | 156938   | 140053   |
| 7  | 10  | 421032   | 410131   | 103150   | 86513    | 34213    | 39424    |
| 8  | 20  | 365629   | 403128   | 16646    | 17380    | 0        | 0        |
| 9  |     |          |          |          |          |          |          |
| 10 | 0   | 1        | 1        | 1        | 1        | 1        | 1        |
| 11 | 1   | 0.998885 | 0.994388 | 0.916134 | 0.931166 | 0.939023 | 0.915697 |
| 12 | 3   | 0.990651 | 0.989898 | 0.695073 | 0.675929 | 0.673546 | 0.685996 |
| 13 | 5   | 0.891764 | 0.907161 | 0.522286 | 0.48327  | 0.422827 | 0.405407 |
| 14 | 7   | 0.718131 | 0.749602 | 0.33135  | 0.322274 | 0.214788 | 0.191679 |
| 15 | 10  | 0.58883  | 0.573585 | 0.139763 | 0.117221 | 0.046824 | 0.053956 |
| 16 | 20  | 0.511347 | 0.563791 | 0.022554 | 0.023549 | 0        | 0        |
| 17 |     |          |          |          |          |          |          |
| 18 |     |          |          |          |          |          |          |
| 19 |     |          |          |          |          |          |          |
| 20 |     |          |          |          |          |          |          |

Fig. 3d

Reaction conditions:  $c(\text{PMS}) = 0.3 \text{ mmol}\cdot\text{L}^{-1}$ ,  $c(\text{catalyst}) = 50 \text{ mg}\cdot\text{L}^{-1}$ ,  $c(\text{BSM}) = 10 \text{ mg}\cdot\text{L}^{-1}$ ,  $\text{pH} = 7.0$ ,  $T = 25^\circ\text{C}$ .

|    | 0  |          | 10       |          | 20       |          | 30       |          | 40       |          | 50       |          |          |
|----|----|----------|----------|----------|----------|----------|----------|----------|----------|----------|----------|----------|----------|
| 1  |    |          |          |          |          |          |          |          |          |          |          |          |          |
| 2  | 0  | 712.217  | 712.217  | 765387   | 765387   | 730272   | 730272   | 730272   | 730272   | 730272   | 730666   | 730666   |          |
| 3  | 1  | 677.814  | 682.087  | 712630   | 708789   | 711272   | 726674   | 678913   | 672920   | 671594   | 673584   | 686112   | 669069   |
| 4  | 3  | 680.562  | 685.416  | 680423   | 666239   | 649405   | 643587   | 528212   | 556276   | 537087   | 503006   | 492137   | 501234   |
| 5  | 5  | 688.405  | 679.612  | 589131   | 539131   | 564750   | 538668   | 397144   | 385274   | 360659   | 305670   | 308945   | 296217   |
| 6  | 7  | 680.157  | 670.542  | 506374   | 518575   | 493283   | 546481   | 257369   | 263323   | 169758   | 130715   | 156938   | 140053   |
| 7  | 10 | 665.241  | 657.022  | 428285   | 424904   | 411421   | 364384   | 91235    | 46237    | 45783    | 34491    | 34213    | 39424    |
| 8  | 20 | 668.07   | 599.171  | 181996   | 193123   | 145898   | 132043   | 5631     | 4320     | 5602     | 4827     | 0        | 0        |
| 9  |    |          |          |          |          |          |          |          |          |          |          |          |          |
| 10 | 0  | 1        | 1        | 1        | 1        | 1        | 1        | 1        | 1        | 1        | 1        | 1        | 1        |
| 11 | 1  | 0.951696 | 0.957695 | 0.931071 | 0.926053 | 0.973982 | 0.995073 | 0.929671 | 0.921465 | 0.919649 | 0.922374 | 0.939023 | 0.915697 |
| 12 | 3  | 0.955554 | 0.96237  | 0.888992 | 0.87046  | 0.889265 | 0.881298 | 0.723309 | 0.761738 | 0.735462 | 0.688793 | 0.673546 | 0.685996 |
| 13 | 5  | 0.966566 | 0.95422  | 0.769716 | 0.70439  | 0.773342 | 0.737627 | 0.54383  | 0.527576 | 0.493869 | 0.41857  | 0.422827 | 0.405407 |
| 14 | 7  | 0.954986 | 0.941486 | 0.661592 | 0.677533 | 0.675478 | 0.748325 | 0.352429 | 0.360582 | 0.232459 | 0.178995 | 0.214788 | 0.191679 |
| 15 | 10 | 0.934043 | 0.922503 | 0.559567 | 0.555149 | 0.56338  | 0.49897  | 0.124933 | 0.063315 | 0.062693 | 0.04723  | 0.046824 | 0.053956 |
| 16 | 20 | 0.938015 | 0.841276 | 0.237783 | 0.252321 | 0.199786 | 0.180813 | 0.007711 | 0.005916 | 0.007671 | 0.00661  | 0        | 0        |
| 17 |    |          |          |          |          |          |          |          |          |          |          |          |          |
| 18 |    |          |          |          |          |          |          |          |          |          |          |          |          |
| 19 |    |          |          |          |          |          |          |          |          |          |          |          |          |
| 20 |    |          |          |          |          |          |          |          |          |          |          |          |          |

Fig. 4a

Reaction conditions:  $c(\text{PMS}) = 10 \text{ mmol}\cdot\text{L}^{-1}$ ,  $c(\text{BSM}) = 10 \text{ mg}\cdot\text{L}^{-1}$ ,  $T = 25^\circ\text{C}$ .

| 1  | PMS | 0        | 0.1      | 0.2      | 0.3      | 0.4      |          |          |          |          |          |
|----|-----|----------|----------|----------|----------|----------|----------|----------|----------|----------|----------|
| 2  | 0   | 730272   | 730272   | 735179   | 735179   | 793990   | 793990   | 730272   | 730272   | 730666   | 730666   |
| 3  | 1   | 700663   | 697866   | 719778   | 716946   | 721936   | 734503   | 671594   | 673584   | 676785   | 654031   |
| 4  | 3   | 683701   | 691866   | 691912   | 699457   | 562708   | 584462   | 537087   | 533006   | 419779   | 460412   |
| 5  | 5   | 668793   | 685122   | 693203   | 638768   | 476581   | 516257   | 360659   | 365670   | 159622   | 189244   |
| 6  | 7   | 670524   | 675648   | 619204   | 609204   | 385530   | 443453   | 169758   | 160715   | 71535    | 84327    |
| 7  | 10  | 660158   | 669818   | 545456   | 537045   | 317761   | 268179   | 45783    | 34491    | 20029    | 33891    |
| 8  | 20  | 652136   | 660143   | 500836   | 453621   | 60619    | 54851    | 5602     | 4827     | 0        | 0        |
| 9  |     |          |          |          |          |          |          |          |          |          |          |
| 10 | 0   | 1        | 1        | 1        | 1        | 1        | 1        | 1        | 1        | 1        | 1        |
| 11 | 1   | 0.959455 | 0.955625 | 0.979051 | 0.975199 | 0.909251 | 0.925078 | 0.919649 | 0.922374 | 0.926258 | 0.895116 |
| 12 | 3   | 0.936228 | 0.947409 | 0.941148 | 0.95141  | 0.708709 | 0.736108 | 0.735462 | 0.729873 | 0.574516 | 0.630126 |
| 13 | 5   | 0.915814 | 0.938174 | 0.942904 | 0.868861 | 0.600236 | 0.650206 | 0.493869 | 0.500731 | 0.218461 | 0.259002 |
| 14 | 7   | 0.918184 | 0.9252   | 0.842249 | 0.828647 | 0.48556  | 0.558512 | 0.232459 | 0.220076 | 0.097904 | 0.115411 |
| 15 | 10  | 0.903989 | 0.917217 | 0.741936 | 0.730496 | 0.400208 | 0.337761 | 0.062693 | 0.04723  | 0.027412 | 0.046384 |
| 16 | 20  | 0.893004 | 0.903969 | 0.681244 | 0.617021 | 0.076347 | 0.069083 | 0.007671 | 0.00661  | 0        | 0        |
| 17 |     |          |          |          |          |          |          |          |          |          |          |
| 18 |     |          |          |          |          |          |          |          |          |          |          |
| 19 |     |          |          |          |          |          |          |          |          |          |          |
| 20 |     |          |          |          |          |          |          |          |          |          |          |

**Fig. 4b**  
**Reaction conditions: c(catalyst) = 40 mg·L<sup>-1</sup>, c(PMS) = 10 mmol·L<sup>-1</sup>, c(BSM) = 10 mg·L<sup>-1</sup>, T = 25°C.**

| 1  | pH | 3        | 5        | 7        | 9        | 11       |          |          |          |          |          |
|----|----|----------|----------|----------|----------|----------|----------|----------|----------|----------|----------|
| 2  | 0  | 720691   | 720691   | 716013   | 716013   | 730272   | 730272   | 736220   | 736220   | 744856   | 744856   |
| 3  | 1  | 638048   | 641276   | 633914   | 632172   | 671594   | 673584   | 708399   | 725687   | 716689   | 703354   |
| 4  | 3  | 602363   | 593840   | 474533   | 529012   | 537087   | 533006   | 675457   | 681132   | 661561   | 677953   |
| 5  | 5  | 559659   | 553208   | 395023   | 360479   | 360659   | 365670   | 622014   | 617352   | 635932   | 661260   |
| 6  | 7  | 535316   | 547291   | 265200   | 226505   | 169758   | 160715   | 592448   | 596461   | 645100   | 647706   |
| 7  | 10 | 517119   | 497189   | 53516    | 94650    | 45783    | 34491    | 518976   | 518011   | 645086   | 645263   |
| 8  | 20 | 345443   | 354118   | 9519     | 11321    | 5602     | 4827     | 102434   | 121505   | 608962   | 615305   |
| 9  |    |          |          |          |          |          |          |          |          |          |          |
| 10 |    |          |          |          |          |          |          |          |          |          |          |
| 11 | 0  | 1        | 1        | 1        | 1        | 1        | 1        | 1        | 1        | 1        | 1        |
| 12 | 1  | 0.885328 | 0.889807 | 0.885339 | 0.882906 | 0.919649 | 0.922374 | 0.962211 | 0.985693 | 0.962185 | 0.944282 |
| 13 | 3  | 0.835813 | 0.823987 | 0.662744 | 0.73883  | 0.735462 | 0.729873 | 0.917466 | 0.925175 | 0.888173 | 0.91018  |
| 14 | 5  | 0.776559 | 0.767608 | 0.551698 | 0.503453 | 0.493869 | 0.500731 | 0.844875 | 0.838543 | 0.853765 | 0.887769 |
| 15 | 7  | 0.742782 | 0.759398 | 0.370384 | 0.316342 | 0.232459 | 0.220076 | 0.804716 | 0.810167 | 0.866073 | 0.869572 |
| 16 | 10 | 0.717532 | 0.689878 | 0.074742 | 0.13219  | 0.062693 | 0.04723  | 0.70492  | 0.703609 | 0.866055 | 0.866292 |
| 17 | 20 | 0.479322 | 0.491359 | 0.013294 | 0.015811 | 0.007671 | 0.00661  | 0.139135 | 0.165039 | 0.817557 | 0.826072 |
| 18 |    |          |          |          |          |          |          |          |          |          |          |
| 19 |    |          |          |          |          |          |          |          |          |          |          |
| 20 |    |          |          |          |          |          |          |          |          |          |          |

**Fig. 4c**  
**Reaction conditions: c(catalyst) = 40 mg·L<sup>-1</sup>, c(BSM) = 10 mg·L<sup>-1</sup>, T = 25°C.**

| 1  | C(Cl <sup>-</sup> ) | 1        | 5        | 10       | control  |          |          |          |          |
|----|---------------------|----------|----------|----------|----------|----------|----------|----------|----------|
| 2  | 0                   | 722347   | 722347   | 712417   | 712417   | 681109   | 681109   | 730272   | 730272   |
| 3  | 1                   | 670675   | 672130   | 698414   | 679214   | 661187   | 656130   | 671594   | 673584   |
| 4  | 3                   | 532416   | 538157   | 552167   | 557367   | 540927   | 538157   | 537087   | 533006   |
| 5  | 5                   | 380421   | 382168   | 401456   | 421045   | 387246   | 409031   | 360659   | 365670   |
| 6  | 7                   | 201468   | 214035   | 270451   | 280167   | 269413   | 293387   | 169758   | 160715   |
| 7  | 10                  | 71453    | 84241    | 110542   | 123587   | 122818   | 151698   | 45783    | 34491    |
| 8  | 20                  | 6358     | 6658     | 6487     | 7594     | 8224     | 8763     | 5602     | 4827     |
| 9  |                     |          |          |          |          |          |          |          |          |
| 10 | 0                   | 1        | 1        | 1        | 1        | 1        | 1        | 1        | 1        |
| 11 | 1                   | 0.928467 | 0.930481 | 0.980344 | 0.953394 | 0.970751 | 0.963326 | 0.919649 | 0.922374 |
| 12 | 3                   | 0.737064 | 0.745012 | 0.775062 | 0.782361 | 0.794186 | 0.790119 | 0.735462 | 0.729873 |
| 13 | 5                   | 0.526646 | 0.529064 | 0.563513 | 0.591009 | 0.568552 | 0.600537 | 0.493869 | 0.500731 |
| 14 | 7                   | 0.278908 | 0.296305 | 0.379625 | 0.393263 | 0.39555  | 0.430749 | 0.232459 | 0.220076 |
| 15 | 10                  | 0.098918 | 0.116621 | 0.155165 | 0.173476 | 0.180321 | 0.222722 | 0.062693 | 0.04723  |
| 16 | 20                  | 0.008802 | 0.009217 | 0.009106 | 0.010659 | 0.012074 | 0.012866 | 0.007671 | 0.00661  |
| 17 |                     |          |          |          |          |          |          |          |          |
| 18 |                     |          |          |          |          |          |          |          |          |
| 19 |                     |          |          |          |          |          |          |          |          |
| 20 |                     |          |          |          |          |          |          |          |          |

**Fig. 5a**  
**Reaction conditions: c(PMS) = 0.3 mmol·L<sup>-1</sup>, c(catalyst) = 40 mg·L<sup>-1</sup>, c(BSM) = 10 mg·L<sup>-1</sup>, pH = 7.0, T = 25°C.**

| 1  | C(NO <sub>2</sub> <sup>-</sup> ) | 1        | 5        | 10       | control  |          |          |          |          |
|----|----------------------------------|----------|----------|----------|----------|----------|----------|----------|----------|
| 2  | 0                                | 736854   | 736854   | 745871   | 745871   | 734271   | 734271   | 730272   | 730272   |
| 3  | 1                                | 672450   | 662451   | 673684   | 664512   | 674066   | 649091   | 671594   | 673584   |
| 4  | 3                                | 537142   | 541451   | 542012   | 522042   | 549205   | 506787   | 537087   | 533006   |
| 5  | 5                                | 380415   | 370514   | 390451   | 372984   | 390446   | 372950   | 360659   | 365670   |
| 6  | 7                                | 187245   | 154052   | 165012   | 177536   | 197913   | 150706   | 169758   | 160715   |
| 7  | 10                               | 54812    | 44812    | 54871    | 45712    | 62722    | 33736    | 45783    | 34491    |
| 8  | 20                               | 4152     | 6524     | 3687     | 7821     | 18082    | 0        | 5602     | 4827     |
| 9  |                                  |          |          |          |          |          |          |          |          |
| 10 | 0                                | 1        | 1        | 1        | 1        | 1        | 1        | 1        | 1        |
| 11 | 1                                | 0.912596 | 0.899026 | 0.903218 | 0.890921 | 0.918007 | 0.883994 | 0.919649 | 0.922374 |
| 12 | 3                                | 0.728967 | 0.734814 | 0.726683 | 0.699909 | 0.74796  | 0.690191 | 0.735462 | 0.729873 |
| 13 | 5                                | 0.516269 | 0.502832 | 0.523483 | 0.500065 | 0.531746 | 0.507919 | 0.493869 | 0.500731 |
| 14 | 7                                | 0.254114 | 0.209067 | 0.221234 | 0.238025 | 0.269537 | 0.205246 | 0.232459 | 0.220076 |
| 15 | 10                               | 0.074387 | 0.060815 | 0.073566 | 0.061287 | 0.085421 | 0.045945 | 0.062693 | 0.04723  |
| 16 | 20                               | 0.005635 | 0.008854 | 0.004943 | 0.010486 | 0.024626 | 0        | 0.007671 | 0.00661  |
| 17 |                                  |          |          |          |          |          |          |          |          |
| 18 |                                  |          |          |          |          |          |          |          |          |
| 19 |                                  |          |          |          |          |          |          |          |          |
| 20 |                                  |          |          |          |          |          |          |          |          |

**Fig. 5b**  
**Reaction conditions: c(PMS) = 0.3 mmol·L<sup>-1</sup>, c(catalyst) = 40 mg·L<sup>-1</sup>, c(BSM) = 10 mg·L<sup>-1</sup>, pH = 7.0, T = 25°C.**



| 1  | C(HA) | 1        | 5        | 10       | control  |          |          |
|----|-------|----------|----------|----------|----------|----------|----------|
| 2  | 0     | 736272   | 736272   | 725487   | 725487   | 697052   | 730272   |
| 3  | 1     | 702513   | 698015   | 698124   | 695142   | 675660   | 660875   |
| 4  | 3     | 532045   | 530214   | 538462   | 534613   | 504273   | 503697   |
| 5  | 5     | 365415   | 370845   | 366142   | 364259   | 368468   | 359481   |
| 6  | 7     | 169451   | 176458   | 182054   | 172542   | 172283   | 187028   |
| 7  | 10    | 34154    | 35142    | 20574    | 25167    | 14120    | 17872    |
| 8  | 20    | 6451     | 0        | 1432     | 2154     | 0        | 5602     |
| 9  |       |          |          |          |          |          |          |
| 10 | 0     | 1        | 1        | 1        | 1        | 1        | 1        |
| 11 | 1     | 0.954149 | 0.94804  | 0.962283 | 0.958173 | 0.969311 | 0.9481   |
| 12 | 3     | 0.72262  | 0.720133 | 0.742208 | 0.736902 | 0.723437 | 0.72261  |
| 13 | 5     | 0.496304 | 0.503679 | 0.504684 | 0.502089 | 0.528609 | 0.515716 |
| 14 | 7     | 0.230147 | 0.239664 | 0.25094  | 0.237829 | 0.247159 | 0.268313 |
| 15 | 10    | 0.046388 | 0.04773  | 0.028359 | 0.03469  | 0.020257 | 0.025639 |
| 16 | 20    | 0.008762 | 0        | 0.001974 | 0.002969 | 0        | 0.007671 |
| 17 |       |          |          |          |          |          |          |
| 18 |       |          |          |          |          |          |          |
| 19 |       |          |          |          |          |          |          |
| 20 |       |          |          |          |          |          |          |
| 21 |       |          |          |          |          |          |          |

**Fig. 5c**  
**Reaction conditions:  $c(\text{PMS}) = 0.3 \text{ mmol}\cdot\text{L}^{-1}$ ,  $c(\text{catalyst}) = 40 \text{ mg}\cdot\text{L}^{-1}$ ,  $c(\text{BSM}) = 10 \text{ mg}\cdot\text{L}^{-1}$ ,  $\text{pH} = 7.0$ ,  $T = 25^\circ\text{C}$ .**

| 1  | C(HCO <sub>3</sub> <sup>-</sup> ) | 1        | 5        | 10       | control  |          |          |
|----|-----------------------------------|----------|----------|----------|----------|----------|----------|
| 2  | 0                                 | 759174   | 759174   | 748147   | 748147   | 759976   | 759976   |
| 3  | 1                                 | 727617   | 712860   | 710629   | 706275   | 700939   | 722860   |
| 4  | 3                                 | 694143   | 701348   | 701103   | 702435   | 709531   | 707656   |
| 5  | 5                                 | 671622   | 659345   | 674451   | 674145   | 693227   | 680573   |
| 6  | 7                                 | 633151   | 640512   | 651600   | 653753   | 686146   | 662467   |
| 7  | 10                                | 591740   | 600667   | 633709   | 642154   | 661828   | 659651   |
| 8  | 20                                | 528303   | 540215   | 585656   | 590146   | 593721   | 618939   |
| 9  |                                   |          |          |          |          |          |          |
| 10 | 0                                 | 1        | 1        | 1        | 1        | 1        | 1        |
| 11 | 1                                 | 0.958432 | 0.938994 | 0.949852 | 0.944032 | 0.922317 | 0.951162 |
| 12 | 3                                 | 0.91434  | 0.92383  | 0.937119 | 0.9389   | 0.933623 | 0.931156 |
| 13 | 5                                 | 0.884675 | 0.868503 | 0.901495 | 0.901086 | 0.91217  | 0.895519 |
| 14 | 7                                 | 0.834    | 0.843696 | 0.870952 | 0.87383  | 0.902852 | 0.871695 |
| 15 | 10                                | 0.779452 | 0.791211 | 0.847038 | 0.858326 | 0.870854 | 0.867989 |
| 16 | 20                                | 0.695892 | 0.711583 | 0.782809 | 0.78881  | 0.781237 | 0.814419 |
| 17 |                                   |          |          |          |          |          |          |
| 18 |                                   |          |          |          |          |          |          |
| 19 |                                   |          |          |          |          |          |          |
| 20 |                                   |          |          |          |          |          |          |
| 21 |                                   |          |          |          |          |          |          |

**Fig. 5d**  
**Reaction conditions:  $c(\text{PMS}) = 0.3 \text{ mmol}\cdot\text{L}^{-1}$ ,  $c(\text{catalyst}) = 40 \text{ mg}\cdot\text{L}^{-1}$ ,  $c(\text{BSM}) = 10 \text{ mg}\cdot\text{L}^{-1}$ ,  $\text{pH} = 7.0$ ,  $T = 25^\circ\text{C}$ .**

| 1  | C(H <sub>2</sub> PO <sub>4</sub> <sup>-</sup> ) | 1        | 5        | 10       | control  |          |          |
|----|-------------------------------------------------|----------|----------|----------|----------|----------|----------|
| 2  | 0                                               | 736395   | 736395   | 737158   | 737158   | 728279   | 728279   |
| 3  | 1                                               | 688710   | 678710   | 656684   | 698041   | 645689   | 679750   |
| 4  | 3                                               | 526784   | 529726   | 529643   | 546614   | 499161   | 550237   |
| 5  | 5                                               | 387514   | 398416   | 395743   | 410687   | 406331   | 438966   |
| 6  | 7                                               | 294856   | 274135   | 278437   | 331456   | 306922   | 336515   |
| 7  | 10                                              | 164872   | 185241   | 205483   | 173514   | 195369   | 237783   |
| 8  | 20                                              | 34152    | 52341    | 80581    | 79694    | 89653    | 97136    |
| 9  |                                                 |          |          |          |          |          |          |
| 10 | 0                                               | 1        | 1        | 1        | 1        | 1        | 1        |
| 11 | 1                                               | 0.935245 | 0.921666 | 0.890832 | 0.946935 | 0.886596 | 0.933365 |
| 12 | 3                                               | 0.715355 | 0.71935  | 0.718493 | 0.741515 | 0.685398 | 0.755531 |
| 13 | 5                                               | 0.526231 | 0.541036 | 0.53685  | 0.557122 | 0.557933 | 0.602744 |
| 14 | 7                                               | 0.400405 | 0.372266 | 0.377717 | 0.44964  | 0.421435 | 0.462069 |
| 15 | 10                                              | 0.223891 | 0.251551 | 0.27875  | 0.235382 | 0.268261 | 0.3265   |
| 16 | 20                                              | 0.046377 | 0.071077 | 0.109313 | 0.10811  | 0.123103 | 0.133377 |
| 17 |                                                 |          |          |          |          |          |          |
| 18 |                                                 |          |          |          |          |          |          |
| 19 |                                                 |          |          |          |          |          |          |
| 20 |                                                 |          |          |          |          |          |          |
| 21 |                                                 |          |          |          |          |          |          |

**Fig. 5e**  
**Reaction conditions:  $c(\text{PMS}) = 0.3 \text{ mmol}\cdot\text{L}^{-1}$ ,  $c(\text{catalyst}) = 40 \text{ mg}\cdot\text{L}^{-1}$ ,  $c(\text{BSM}) = 10 \text{ mg}\cdot\text{L}^{-1}$ ,  $\text{pH} = 7.0$ ,  $T = 25^\circ\text{C}$ .**

| 1  |    | R1       | R2       | R3       |          |          |          |
|----|----|----------|----------|----------|----------|----------|----------|
| 2  | 0  | 730666   | 730666   | 730241   | 730241   | 727587   | 727587   |
| 3  | 1  | 686112   | 669069   | 659606   | 641305   | 637606   | 642308   |
| 4  | 3  | 492137   | 501234   | 587123   | 580662   | 539219   | 557326   |
| 5  | 5  | 308945   | 296217   | 474922   | 464137   | 496382   | 487654   |
| 6  | 10 | 34213    | 39424    | 262986   | 248017   | 280198   | 247708   |
| 7  | 20 | 0        | 0        | 75219    | 69634    | 96279    | 106349   |
| 8  |    |          |          |          |          |          |          |
| 9  | 0  | 1        | 1        | 1        | 1        | 1        | 1        |
| 10 | 1  | 0.939023 | 0.915697 | 0.903272 | 0.87821  | 0.87633  | 0.882792 |
| 11 | 3  | 0.673546 | 0.685996 | 0.804013 | 0.795165 | 0.741106 | 0.765992 |
| 12 | 5  | 0.422827 | 0.405407 | 0.650363 | 0.635594 | 0.68223  | 0.670235 |
| 13 | 10 | 0.046824 | 0.053956 | 0.360136 | 0.339637 | 0.385106 | 0.340451 |
| 14 | 20 | 0        | 0        | 0.103006 | 0.095358 | 0.132326 | 0.146167 |
| 15 |    |          |          |          |          |          |          |
| 16 |    |          |          |          |          |          |          |
| 17 |    |          |          |          |          |          |          |
| 18 |    |          |          |          |          |          |          |
| 19 |    |          |          |          |          |          |          |
| 20 |    |          |          |          |          |          |          |
| 21 |    |          |          |          |          |          |          |

**Fig. 5f**  
**Reaction conditions:  $c(\text{PMS}) = 0.3 \text{ mmol}\cdot\text{L}^{-1}$ ,  $c(\text{catalyst}) = 40 \text{ mg}\cdot\text{L}^{-1}$ ,  $c(\text{BSM}) = 10 \text{ mg}\cdot\text{L}^{-1}$ ,  $\text{pH} = 7.0$ ,  $T = 25^\circ\text{C}$ .**



|    | Yantze River |          |          | Xuanwu Lake |          |
|----|--------------|----------|----------|-------------|----------|
| 1  |              |          |          |             |          |
| 2  | 0            | 793990   | 793990   | 791875      | 791875   |
| 3  | 3            | 606080   | 592439   | 648972      | 628461   |
| 4  | 7            | 280105   | 270151.5 | 301650      | 307379   |
| 5  | 10           | 256093   | 258443   | 270313      | 277379   |
| 6  | 15           | 230789   | 232607   | 231558      | 221400   |
| 7  | 20           | 197262   | 190271   | 186292      | 171292   |
| 8  |              |          |          |             |          |
| 9  | 0            | 1        | 1        | 1           | 1        |
| 10 | 3            | 0.763335 | 0.746154 | 0.819538    | 0.793637 |
| 11 | 7            | 0.352782 | 0.340245 | 0.380931    | 0.388166 |
| 12 | 10           | 0.322539 | 0.325499 | 0.341358    | 0.350281 |
| 13 | 15           | 0.29067  | 0.29296  | 0.292417    | 0.27959  |
| 14 | 20           | 0.248444 | 0.239639 | 0.235254    | 0.216312 |
| 15 |              |          |          |             |          |
| 16 |              |          |          |             |          |
| 17 |              |          |          |             |          |
| 18 |              |          |          |             |          |
| 19 |              |          |          |             |          |
| 20 |              |          |          |             |          |

**Fig. 5g**  
**Reaction conditions:  $c(\text{PMS}) = 0.3 \text{ mmol}\cdot\text{L}^{-1}$ ,  $c(\text{catalyst}) = 40 \text{ mg}\cdot\text{L}^{-1}$ ,  $c(\text{BSM}) = 10 \text{ mg}\cdot\text{L}^{-1}$ ,  $\text{pH} = 7.0$ ,  $T = 25^\circ\text{C}$ .**

|    | MA | TBA      |          | PBQ      |          | FFA      |          | control  |          |
|----|----|----------|----------|----------|----------|----------|----------|----------|----------|
| 1  |    |          |          |          |          |          |          |          |          |
| 2  | 0  | 710661   | 710661   | 710661   | 720278   | 720278   | 701321   | 701321   | 730272   |
| 3  | 1  | 694398   | 679537   | 693094   | 678447   | 689331   | 668766   | 684457   | 676532   |
| 4  | 3  | 637776   | 645882   | 622921   | 629538   | 626752   | 627727   | 634459   | 626186   |
| 5  | 5  | 609918   | 617629   | 571920   | 581944   | 587989   | 559761   | 620726   | 617413   |
| 6  | 7  | 604212   | 612067   | 498687   | 493431   | 521824   | 502321   | 616679   | 607876   |
| 7  | 10 | 584692   | 600277   | 369603   | 382803   | 345448   | 300170   | 592458   | 585418   |
| 8  | 20 | 548295   | 560352   | 162321   | 151791   | 92464    | 76625    | 549382   | 553418   |
| 9  |    |          |          |          |          |          |          |          |          |
| 10 | 0  | 1        | 1        | 1        | 1        | 1        | 1        | 1        | 1        |
| 11 | 1  | 0.977116 | 0.956204 | 0.975281 | 0.95467  | 0.957035 | 0.928483 | 0.975954 | 0.964654 |
| 12 | 3  | 0.897441 | 0.908847 | 0.876537 | 0.885849 | 0.870153 | 0.871507 | 0.904663 | 0.892866 |
| 13 | 5  | 0.85824  | 0.869091 | 0.804772 | 0.818877 | 0.816336 | 0.777146 | 0.885081 | 0.880357 |
| 14 | 7  | 0.850211 | 0.861264 | 0.701723 | 0.694327 | 0.724476 | 0.697399 | 0.879311 | 0.866759 |
| 15 | 10 | 0.822744 | 0.844674 | 0.520083 | 0.538658 | 0.479604 | 0.416742 | 0.844774 | 0.834736 |
| 16 | 20 | 0.771528 | 0.788494 | 0.228408 | 0.213591 | 0.128373 | 0.106383 | 0.783353 | 0.789108 |
| 17 |    |          |          |          |          |          |          |          |          |
| 18 |    |          |          |          |          |          |          |          |          |
| 19 |    |          |          |          |          |          |          |          |          |
| 20 |    |          |          |          |          |          |          |          |          |

**Fig. 6a**  
**Reaction conditions:  $c(\text{PMS}) = 0.3 \text{ mmol}\cdot\text{L}^{-1}$ ,  $c(\text{catalyst}) = 40 \text{ mg}\cdot\text{L}^{-1}$ ,  $c(\text{BSM}) = 10 \text{ mg}\cdot\text{L}^{-1}$ ,  $\text{pH} = 7.0$ ,  $T = 25^\circ\text{C}$ .**

|    | p-BQ(1) | p-BQ(5)  |          | p-BQ(10) |          | N2       |          |
|----|---------|----------|----------|----------|----------|----------|----------|
| 1  |         |          |          |          |          |          |          |
| 2  | 0       | 720278   | 720278   | 715055   | 715055   | 724911   | 724911   |
| 3  | 1       | 689331   | 668766   | 683601   | 704802   | 714537   | 716524   |
| 4  | 3       | 626752   | 627727   | 677080   | 663902   | 703154   | 698451   |
| 5  | 5       | 587989   | 559761   | 656528   | 681943   | 702457   | 695412   |
| 6  | 7       | 521824   | 502321   | 597868   | 655601   | 681254   | 695874   |
| 7  | 10      | 345448   | 300170   | 576925   | 566403   | 685481   | 684781   |
| 8  | 20      | 92464    | 76625    | 480147   | 445447   | 651321   | 654125   |
| 9  |         |          |          |          |          |          |          |
| 10 | 0       | 1        | 1        | 1        | 1        | 1        | 1        |
| 11 | 1       | 0.957035 | 0.928483 | 0.956012 | 0.985661 | 0.985689 | 0.98843  |
| 12 | 3       | 0.870153 | 0.871507 | 0.946892 | 0.928463 | 0.969987 | 0.963499 |
| 13 | 5       | 0.816336 | 0.777146 | 0.91815  | 0.953693 | 0.969025 | 0.959307 |
| 14 | 7       | 0.724476 | 0.697399 | 0.836115 | 0.916854 | 0.939776 | 0.959944 |
| 15 | 10      | 0.479604 | 0.416742 | 0.806826 | 0.792111 | 0.945607 | 0.944641 |
| 16 | 20      | 0.128373 | 0.106383 | 0.671483 | 0.622955 | 0.898484 | 0.902352 |
| 17 |         |          |          |          |          |          |          |
| 18 |         |          |          |          |          |          |          |
| 19 |         |          |          |          |          |          |          |
| 20 |         |          |          |          |          |          |          |
| 21 |         |          |          |          |          |          |          |
| 22 |         |          |          |          |          |          |          |

**Fig. 7a**  
**Reaction conditions:  $c(\text{PMS}) = 0.3 \text{ mmol}\cdot\text{L}^{-1}$ ,  $c(\text{catalyst}) = 40 \text{ mg}\cdot\text{L}^{-1}$ ,  $c(\text{BSM}) = 10 \text{ mg}\cdot\text{L}^{-1}$ ,  $\text{pH} = 7.0$ ,  $T = 25^\circ\text{C}$ .**
